# Supplementary material for: Synthesis, structure and characterization of M(IO3)2(HIO3) (M = Ca, Sr) as new anhydrous alkaline earth metal bis-iodate hydrogeniodate compounds
Source: Royal Society of Chemistry journal article supplement (doi:10.1039/c9dt02575h), 2019-01-01
Supplement: c9dt02575h1.pdf [file c9dt02575h1.pdf]

Electronic Supplementary Information

**Synthesis, structure and characterizations of  $M(\text{IO}_3)_2(\text{HIO}_3)$   
( $M = \text{Ca}, \text{Sr}$ ), new anhydrous alkaline earth metal bis-iodate  
hydrogeniodate compounds**

Yawen An,<sup>a</sup> Yang Zhong,<sup>a</sup> Tongqing Sun,<sup>\*ab</sup> Haijun Wang,<sup>a</sup> Zhenpeng Hu,<sup>a</sup>

Hongde Liu,<sup>ab</sup> Shiguo Liu,<sup>a</sup> Yongfa Kong<sup>abc</sup> and Jingjun Xu<sup>abc</sup>

- a. School of Physics, Nankai University, Tianjin 300071, China.
- b. The MOE Key Laboratory of Weak-Light Nonlinear Photonics, Nankai University, Tianjin 300457, China.
- c. TEDA Institute of Applied Physics, Nankai University, Tianjin 300457, China.

## Contents

- Table S1** Crystallographic data and structure refinements for  $M(\text{IO}_3)_2(\text{HIO}_3)$  ( $M = \text{Ca}, \text{Sr}$ ).
- Table S2** Atomic coordinates and equivalent isotropic displacement parameters ( $\text{\AA}^2 \times 10^3$ ) for  $M(\text{IO}_3)_2(\text{HIO}_3)$  ( $M = \text{Ca}, \text{Sr}$ ).
- Table S3** Anisotropic displacement parameters ( $\text{\AA}^2 \times 10^3$ ) for  $M(\text{IO}_3)_2(\text{HIO}_3)$  ( $M = \text{Ca}, \text{Sr}$ ).
- Table S4** Selected interatomic distances and calculated bond valence values of the Ca and Sr atoms for  $M(\text{IO}_3)_2(\text{HIO}_3)$  ( $M = \text{Ca}, \text{Sr}$ ).
- Table S5** Selected bond lengths, interatomic distances, calculated bond valence values and bond angles of the iodine atoms for  $\text{Sr}(\text{IO}_3)_2(\text{HIO}_3)$ .
- Table S6** Calculated bond valence sum (BVS) of the O atoms for  $M(\text{IO}_3)_2(\text{HIO}_3)$  ( $M = \text{Ca}, \text{Sr}$ ).
- Table S7** The state energies (eV) of the lowest conduction band (LCB) and the highest valence band (HVB) for  $M(\text{IO}_3)_2(\text{HIO}_3)$  ( $M = \text{Ca}, \text{Sr}$ ).
- Fig. S1** Photos of  $\text{Ca}(\text{IO}_3)_2(\text{HIO}_3)$  (a) and  $\text{Sr}(\text{IO}_3)_2(\text{HIO}_3)$  (b) single crystals by the hydrothermal method.
- Fig. S2** Experimental powder XRD patterns of  $\text{Ca}(\text{IO}_3)_2(\text{HIO}_3)$  (a) and  $\text{Sr}(\text{IO}_3)_2(\text{HIO}_3)$  (b) and the simulated patterns.
- Fig. S3** Powder XRD patterns of the decomposition productions at  $500^\circ\text{C}$  and  $950^\circ\text{C}$  for  $\text{Ca}(\text{IO}_3)_2(\text{HIO}_3)$  (a) and  $\text{Sr}(\text{IO}_3)_2(\text{HIO}_3)$  (b).
- Fig. S4** Views of the asymmetric units of  $\text{Ca}(\text{IO}_3)_2(\text{HIO}_3)$  (a) and  $\text{Sr}(\text{IO}_3)_2(\text{HIO}_3)$  (b) with 50% probability displacement.
- Fig. S5** Coordination environments of the  $[\text{HIO}_3] \cdot [\text{IO}_3]^-$  complex (a) and  $[\text{I}(3)\text{O}_3]^-$  (b) on  $\text{Ca}^{2+}$  in the structure of  $\text{Ca}(\text{IO}_3)_2(\text{HIO}_3)$ .
- Fig. S6**  $\text{Ca}_2\text{O}_{14}$  dimer in the structure of  $\text{Ca}(\text{IO}_3)_2(\text{HIO}_3)$ .

**Table S1** Crystallographic data and structure refinements for  $M(\text{IO}_3)_2(\text{HIO}_3)$  ( $M = \text{Ca}, \text{Sr}$ ).

| Formula                                                                                           | Ca(IO <sub>3</sub> ) <sub>2</sub> (HIO <sub>3</sub> ) | Sr(IO <sub>3</sub> ) <sub>2</sub> (HIO <sub>3</sub> ) |
|---------------------------------------------------------------------------------------------------|-------------------------------------------------------|-------------------------------------------------------|
| F.W.                                                                                              | 565.79                                                | 613.33                                                |
| <i>T</i> (K)                                                                                      | 293(2)                                                | 293(2)                                                |
| Crystal System                                                                                    | Monoclinic                                            | Monoclinic                                            |
| Space Group                                                                                       | <i>P</i> 2 <sub>1</sub> / <i>n</i>                    | <i>P</i> 2 <sub>1</sub> / <i>n</i>                    |
| <i>a</i> (Å)                                                                                      | 6.9647(14)                                            | 7.0697(14)                                            |
| <i>b</i> (Å)                                                                                      | 15.719(3)                                             | 15.986(3)                                             |
| <i>c</i> (Å)                                                                                      | 7.2042(14)                                            | 7.3802(15)                                            |
| $\alpha$ (deg)                                                                                    | 90.00                                                 | 90.00                                                 |
| $\beta$ (deg)                                                                                     | 92.76(3)                                              | 93.13(3)                                              |
| $\gamma$ (deg)                                                                                    | 90.00                                                 | 90.00                                                 |
| <i>V</i> (Å <sup>3</sup> )                                                                        | 787.8(3)                                              | 832.8(3)                                              |
| <i>Z</i>                                                                                          | 4                                                     | 4                                                     |
| $\rho_{\text{cal}}$ (g/cm <sup>3</sup> )                                                          | 4.770                                                 | 4.891                                                 |
| $\mu$ (mm <sup>-1</sup> )                                                                         | 12.578                                                | 17.618                                                |
| <i>F</i> <sub>(000)</sub>                                                                         | 1008                                                  | 1080                                                  |
| Crystal size (mm <sup>3</sup> )                                                                   | 0.16 × 0.12 × 0.11                                    | 0.08 × 0.07 × 0.07                                    |
| 2 $\theta$ range for data collection                                                              | 5.856 to 59.996°                                      | 5.772 to 60.152°                                      |
|                                                                                                   | −9 ≤ <i>h</i> ≤ 9                                     | −9 ≤ <i>h</i> ≤ 9                                     |
| Index ranges                                                                                      | −22 ≤ <i>k</i> ≤ 19                                   | −22 ≤ <i>k</i> ≤ 22                                   |
|                                                                                                   | −10 ≤ <i>l</i> ≤ 8                                    | −10 ≤ <i>l</i> ≤ 10                                   |
| Reflections collected                                                                             | 7098                                                  | 7655                                                  |
| Independent reflections                                                                           | 2240                                                  | 2373                                                  |
| <i>R</i> <sub>int</sub>                                                                           | 0.0442                                                | 0.0501                                                |
| <i>R</i> <sub>sigma</sub>                                                                         | 0.0335                                                | 0.0458                                                |
| Data/restraints/parameters                                                                        | 2240/0/118                                            | 2373/0/118                                            |
| GOF on <i>F</i> <sup>2</sup>                                                                      | 1.217                                                 | 1.161                                                 |
| <i>R</i> <sub>1</sub> , <i>wR</i> <sub>2</sub> ( <i>I</i> > 2 $\sigma$ ( <i>I</i> )) <sup>a</sup> | 0.0346, 0.0843                                        | 0.0438, 0.1003                                        |
| <i>R</i> <sub>1</sub> , <i>wR</i> <sub>2</sub> (all data)                                         | 0.0358, 0.0850                                        | 0.0471, 0.1024                                        |

<sup>a</sup>  $R_1 = \sum ||F_o| - |F_c|| / \sum |F_o|$ ,  $wR_2 = [\sum w(F_o^2 - F_c^2)^2 / \sum w(F_o^2)^2]^{1/2}$ .

**Table S2** Atomic coordinates and equivalent isotropic displacement parameters ( $\text{\AA}^2 \times 10^3$ ) for  $M(\text{IO}_3)_2(\text{HIO}_3)$  ( $M = \text{Ca}, \text{Sr}$ ).  $U_{\text{eq}}$  is defined as one-third of the trace of the orthogonalized  $U_{ij}$  tensor.

| Atom                                     | Wyck. | $x/a$       | $y/b$      | $z/c$       | $U_{\text{eq}}$ |
|------------------------------------------|-------|-------------|------------|-------------|-----------------|
| $\text{Ca}(\text{IO}_3)_2(\text{HIO}_3)$ |       |             |            |             |                 |
| Ca1                                      | 4e    | 0.22814(19) | 0.54636(8) | 0.86712(18) | 12.5(2)         |
| I1                                       | 4e    | 0.85860(5)  | 0.22751(2) | 0.97855(5)  | 8.59(10)        |
| I2                                       | 4e    | 0.39268(5)  | 0.31679(2) | 0.87569(5)  | 9.33(10)        |
| I3                                       | 4e    | 0.26999(5)  | 0.47287(2) | 1.36963(5)  | 9.63(10)        |
| O1                                       | 4e    | 0.8756(8)   | 0.1802(3)  | 0.7468(6)   | 15.4(9)         |
| O2                                       | 4e    | 0.8518(7)   | 0.3366(3)  | 0.8878(6)   | 13.6(9)         |
| O3                                       | 4e    | 0.5979(7)   | 0.2168(3)  | 0.9969(7)   | 16.1(9)         |
| O4                                       | 4e    | 0.4679(7)   | 0.3844(3)  | 1.0655(7)   | 19.0(10)        |
| O5                                       | 4e    | 0.2277(7)   | 0.2464(3)  | 0.9848(8)   | 18.7(10)        |
| O6                                       | 4e    | 0.1876(7)   | 0.3936(3)  | 0.7874(7)   | 13.5(9)         |
| H6                                       | 4e    | 0.08851     | 0.374038   | 0.837204    | 16              |
| O7                                       | 4e    | 0.1173(7)   | 0.4855(3)  | 1.1602(6)   | 13.3(9)         |
| O8                                       | 4e    | 0.1742(7)   | 0.5532(3)  | 1.5184(6)   | 15.0(9)         |
| O9                                       | 4e    | 0.4854(7)   | 0.5262(3)  | 1.2996(7)   | 16.2(9)         |
| $\text{Sr}(\text{IO}_3)_2(\text{HIO}_3)$ |       |             |            |             |                 |
| Sr1                                      | 4e    | 0.24288(10) | 0.54359(5) | 0.87786(11) | 11.46(17)       |
| I1                                       | 4e    | 0.84717(7)  | 0.22889(3) | 0.96634(7)  | 9.54(13)        |
| I2                                       | 4e    | 0.37897(7)  | 0.31309(3) | 0.86172(7)  | 11.09(13)       |
| I3                                       | 4e    | 0.26450(7)  | 0.47368(3) | 1.37467(7)  | 11.33(13)       |
| O1                                       | 4e    | 0.8632(10)  | 0.1830(4)  | 0.7421(8)   | 18.4(13)        |
| O2                                       | 4e    | 0.8475(8)   | 0.3364(3)  | 0.8815(8)   | 13.1(11)        |
| O3                                       | 4e    | 0.5917(8)   | 0.2193(4)  | 0.9862(9)   | 18.6(13)        |
| O4                                       | 4e    | 0.4441(9)   | 0.3834(4)  | 1.0446(9)   | 21.6(14)        |
| O5                                       | 4e    | 0.2216(8)   | 0.2425(4)  | 0.9659(10)  | 21.5(14)        |
| O6                                       | 4e    | 0.1790(8)   | 0.3865(4)  | 0.7662(9)   | 15.7(12)        |
| H6                                       | 4e    | 0.065112    | 0.393719   | 0.794268    | 19              |
| O7                                       | 4e    | 0.1112(8)   | 0.4852(4)  | 1.1725(8)   | 14.1(11)        |
| O8                                       | 4e    | 0.1760(8)   | 0.5537(4)  | 1.5191(8)   | 14.7(12)        |
| O9                                       | 4e    | 0.4764(8)   | 0.5236(4)  | 1.2986(9)   | 19.2(13)        |

**Table S3** Anisotropic displacement parameters ( $\text{\AA}^2 \times 10^3$ ) for  $\text{M}(\text{IO}_3)_2(\text{HIO}_3)$  ( $\text{M} = \text{Ca}, \text{Sr}$ ).

| Atom                                     | $U_{11}$  | $U_{22}$ | $U_{33}$  | $U_{23}$  | $U_{13}$  | $U_{12}$  |
|------------------------------------------|-----------|----------|-----------|-----------|-----------|-----------|
| $\text{Ca}(\text{IO}_3)_2(\text{HIO}_3)$ |           |          |           |           |           |           |
| Ca1                                      | 11.5(5)   | 12.0(5)  | 13.9(5)   | 0.0(4)    | 0.6(4)    | -1.6(4)   |
| I1                                       | 8.56(19)  | 8.25(18) | 9.01(17)  | 1.38(12)  | 0.85(12)  | 0.80(12)  |
| I2                                       | 8.62(19)  | 8.59(18) | 10.86(18) | -0.48(12) | 1.23(12)  | -0.25(13) |
| I3                                       | 10.03(19) | 8.67(18) | 10.11(17) | 0.02(12)  | -0.40(13) | -0.52(13) |
| O1                                       | 27(3)     | 11(2)    | 8.8(19)   | -2.5(16)  | 3.1(17)   | -1.4(19)  |
| O2                                       | 18(2)     | 10(2)    | 13(2)     | 1.3(16)   | 2.1(17)   | 1.4(17)   |
| O3                                       | 10(2)     | 18(2)    | 20(2)     | 7.2(19)   | 2.3(17)   | 2.2(18)   |
| O4                                       | 17(2)     | 24(3)    | 16(2)     | -10.7(19) | 1.9(18)   | -1(2)     |
| O5                                       | 11(2)     | 13(2)    | 32(3)     | 8(2)      | 1.8(19)   | -4.0(18)  |
| O6                                       | 9(2)      | 10(2)    | 21(2)     | 1.5(17)   | 0.4(17)   | 1.5(16)   |
| O7                                       | 12(2)     | 15(2)    | 12(2)     | 0.2(16)   | -3.8(16)  | 0.3(17)   |
| O8                                       | 17(2)     | 13(2)    | 16(2)     | -5.4(17)  | 3.5(17)   | -0.8(18)  |
| O9                                       | 11(2)     | 19(2)    | 18(2)     | 0.0(18)   | 5.7(17)   | -5.0(18)  |
| $\text{Sr}(\text{IO}_3)_2(\text{HIO}_3)$ |           |          |           |           |           |           |
| Sr1                                      | 9.7(3)    | 12.1(4)  | 12.6(4)   | -0.6(3)   | 0.2(3)    | -0.6(2)   |
| I1                                       | 9.4(2)    | 10.2(2)  | 9.0(2)    | 0.88(17)  | -0.31(17) | 0.86(16)  |
| I2                                       | 9.6(2)    | 10.4(2)  | 13.3(3)   | -0.24(18) | 0.54(17)  | -0.09(16) |
| I3                                       | 10.9(2)   | 11.6(2)  | 11.3(3)   | -0.23(18) | -1.33(17) | 0.24(17)  |
| O1                                       | 31(3)     | 17(3)    | 7(3)      | 0(2)      | 1(2)      | -4(3)     |
| O2                                       | 17(3)     | 4(2)     | 18(3)     | 4(2)      | -1(2)     | 2(2)      |
| O3                                       | 5(2)      | 25(3)    | 26(3)     | 8(3)      | -1(2)     | 2(2)      |
| O4                                       | 20(3)     | 20(3)    | 25(3)     | -12(3)    | 1(3)      | -3(3)     |
| O5                                       | 9(3)      | 17(3)    | 38(4)     | 7(3)      | 2(3)      | -3(2)     |
| O6                                       | 9(2)      | 14(3)    | 25(3)     | 3(2)      | -3(2)     | 6(2)      |
| O7                                       | 13(3)     | 18(3)    | 11(3)     | 4(2)      | -5(2)     | 3(2)      |
| O8                                       | 18(3)     | 15(3)    | 11(3)     | -6(2)     | -1(2)     | -2(2)     |
| O9                                       | 13(3)     | 27(3)    | 19(3)     | -8(3)     | 6(2)      | -6(2)     |

**Table S4** Selected interatomic distances and calculated bond valence values of the Ca and Sr atoms for  $M(\text{IO}_3)_2(\text{HIO}_3)$  ( $M = \text{Ca}, \text{Sr}$ ).

| Atoms                 | Distance (Å) | Bond Valence | Atoms                 | Distance (Å) | Bond Valence |
|-----------------------|--------------|--------------|-----------------------|--------------|--------------|
| Ca1–O1 <sup>i</sup>   | 2.359(5)     | 0.347        | Sr1–O1 <sup>i</sup>   | 2.498(6)     | 0.358        |
| Ca1–O2 <sup>ii</sup>  | 2.628(5)     | 0.168        | Sr1–O2 <sup>ii</sup>  | 2.715(6)     | 0.199        |
| Ca1–O4 <sup>ii</sup>  | 2.409(5)     | 0.303        | Sr1–O4 <sup>ii</sup>  | 2.540(6)     | 0.320        |
| Ca1–O6                | 2.483(5)     | 0.267        | Sr1–O6                | 2.674(6)     | 0.223        |
| Ca1–O7                | 2.475(5)     | 0.248        | Sr1–O7                | 2.586(6)     | 0.282        |
| Ca1–O7 <sup>iii</sup> | 2.456(5)     | 0.253        | Sr1–O7 <sup>iii</sup> | 2.553(6)     | 0.309        |
| Ca1–O8 <sup>iv</sup>  | 2.524(5)     | 0.222        | Sr1–O8 <sup>iv</sup>  | 2.669(6)     | 0.226        |
| Ca1–O9 <sup>ii</sup>  | 2.637(5)     | 0.164        | Sr1–O9 <sup>ii</sup>  | 2.659(6)     | 0.232        |
| <Ca1–O>               | 2.496        |              | <Sr1–O>               | 2.612        |              |
|                       | BVS          | 2.15         |                       | BVS          | 1.97         |

<sup>i</sup> 1-x, 1/2+y, 3/2-z; <sup>ii</sup> 1-x, 1-y, 2-z; <sup>iii</sup> -x, 1-y, 2-z; <sup>iv</sup> x, y, -1+z.

**Table S5** Selected bond lengths, interatomic distances, calculated bond valence values and bond angles of the iodine atoms for Sr(IO<sub>3</sub>)<sub>2</sub>(HIO<sub>3</sub>)

| Atoms                | Distance (Å) | Bond Valence | Atoms    | Angle (°) |
|----------------------|--------------|--------------|----------|-----------|
| I1–O1                | 1.820(6)     | 1.640        | O1–I1–O2 | 93.8(3)   |
| I1–O2                | 1.829(5)     | 1.600        | O1–I1–O3 | 98.6(3)   |
| I1–O3                | 1.827(6)     | 1.609        | O2–I1–O3 | 97.2(3)   |
| <I1–O>               | 1.825        |              | <O–I1–O> | 96.3      |
| I1…O1 <sup>i</sup>   | 2.473(6)     | 0.281        |          |           |
| I1…O5 <sup>ii</sup>  | 2.656(6)     | 0.171        |          |           |
| I1…O8 <sup>iii</sup> | 2.808(6)     | 0.114        |          |           |
| BVS (I1)             |              | 5.42         |          |           |
| I2–O4                | 1.797(6)     | 1.745        | O4–I2–O5 | 102.2(3)  |
| I2–O5                | 1.788(6)     | 1.788        | O4–I2–O6 | 92.7(3)   |
| I2–O6                | 1.940(6)     | 1.186        | O5–I2–O6 | 94.6(3)   |
| <I2–O>               | 1.842        |              | <O–I2–O> | 95.9      |
| I2…O3                | 2.281(6)     | 0.473        |          |           |
| I2…O9 <sup>iv</sup>  | 3.065(6)     | 0.057        |          |           |
| BVS (I2)             |              | 5.25         |          |           |
| I3–O7                | 1.805(6)     | 1.708        | O7–I3–O8 | 101.8(3)  |
| I3–O8                | 1.799(6)     | 1.736        | O7–I3–O9 | 99.7(3)   |
| I3–O9                | 1.813(6)     | 1.671        | O8–I3–O9 | 101.0(3)  |
| <I3–O>               | 1.806        |              | <O–I3–O> | 100.8     |
| I3…O9 <sup>v</sup>   | 2.948(3)     | 0.078        |          |           |
| BVS (I3)             |              | 5.19         |          |           |

<sup>i</sup>  $x, 0.5-y, 0.5+z$ ; <sup>ii</sup>  $1+x, y, z$ ; <sup>iii</sup>  $1-x, -0.5+y, 2.5-z$ ; <sup>iv</sup>  $1-x, 1-y, 2-z$ ; <sup>v</sup>  $1-x, 1-y, 3-z$ .

**Table S6** Calculated bond valence sum (BVS) of the O atoms for  $M(\text{IO}_3)_2(\text{HIO}_3)$  ( $M = \text{Ca}, \text{Sr}$ )\*.

| Ca( $\text{IO}_3$ ) <sub>2</sub> ( $\text{HIO}_3$ ) |                |                |       |                |       |      |
|-----------------------------------------------------|----------------|----------------|-------|----------------|-------|------|
| Bond Valence                                        | Ca1            | I1             | I2    | I3             | H6    | BVS  |
| O1                                                  | 0.347          | 1.566<br>0.328 |       |                |       | 2.24 |
| O2                                                  | 0.168          | 1.575          |       |                | 0.344 | 2.09 |
| O3                                                  |                | 1.575          | 0.485 |                |       | 2.06 |
| O4                                                  | 0.303          |                | 1.778 | 0.070          |       | 2.15 |
| O5                                                  |                | 0.206          | 1.717 |                |       | 1.92 |
| O6                                                  | 0.248          |                | 1.145 |                | 0.850 | 2.24 |
| O7                                                  | 0.267<br>0.253 |                |       | 1.667          |       | 2.19 |
| O8                                                  | 0.222          | 0.133          |       | 1.708          |       | 2.06 |
| O9                                                  | 0.164          |                | 0.085 | 1.680<br>0.098 |       | 2.03 |

  

| Sr( $\text{IO}_3$ ) <sub>2</sub> ( $\text{HIO}_3$ ) |                |                |       |                |       |      |
|-----------------------------------------------------|----------------|----------------|-------|----------------|-------|------|
| Bond Valence                                        | Sr1            | I1             | I2    | I3             | H6    | BVS  |
| O1                                                  | 0.358          | 1.640<br>0.281 |       |                |       | 2.28 |
| O2                                                  | 0.199          | 1.600          |       |                | 0.244 | 2.04 |
| O3                                                  |                | 1.609          | 0.473 |                |       | 2.08 |
| O4                                                  | 0.320          |                | 1.745 |                |       | 2.07 |
| O5                                                  |                | 0.171          | 1.788 |                |       | 1.96 |
| O6                                                  | 0.223          |                | 1.186 |                | 0.850 | 2.26 |
| O7                                                  | 0.309<br>0.282 |                |       | 1.708          |       | 2.30 |
| O8                                                  | 0.226          | 0.114          |       | 1.736          |       | 2.08 |
| O9                                                  | 0.232          |                | 0.057 | 1.671<br>0.078 |       | 2.04 |

\* The bond valence parameters  $R_0$  of Ca–O, Sr–O and I–O bonds in the calculations were 1.967, 2.118 and 2.003, respectively.<sup>[1]</sup> For O–H···O hydrogen bond, the value of  $R_0$  was 0.790 for O–H bond, and 1.409 for O···H bond.<sup>[2]</sup> The bond valence parameters  $B$  of all bonds were 0.37.

Ref:

[1] I. D. Brown and D. Altermatt, *Acta Cryst.*, 1985, B41, 244–247.

[2] D. Yu, D. Xue and H. Ratajczak, *Phys. B*, 2006, 371, 170–176.



**Table S7** The state energies (eV) of the lowest conduction band (LCB) and the highest valence band (HVB) for  $M(\text{IO}_3)_2(\text{HIO}_3)$  ( $M = \text{Ca}, \text{Sr}$ ).

| Compound                                 | $k$ -point               | HVB    | LCB   |
|------------------------------------------|--------------------------|--------|-------|
| $\text{Ca}(\text{IO}_3)_2(\text{HIO}_3)$ | Z (0.000, 0.000, 0.500)  | -0.539 | 3.539 |
|                                          | G (0.000, 0.000, 0.000)  | -0.391 | 3.227 |
|                                          | Y (0.000, 0.500, 0.000)  | -0.415 | 3.285 |
|                                          | A (-0.500, 0.500, 0.000) | -0.350 | 3.004 |
|                                          | B (-0.500, 0.000, 0.000) | -0.329 | 2.967 |
|                                          | D (-0.500, 0.000, 0.500) | -0.455 | 3.068 |
|                                          | E (-0.500, 0.500, 0.500) | -0.465 | 3.049 |
|                                          | C (0.000, 0.500, 0.500)  | -0.540 | 3.543 |
| $\text{Sr}(\text{IO}_3)_2(\text{HIO}_3)$ | Z (0.000, 0.000, 0.500)  | -0.581 | 3.566 |
|                                          | G (0.000, 0.000, 0.000)  | -0.393 | 3.251 |
|                                          | Y (0.000, 0.500, 0.000)  | -0.407 | 3.341 |
|                                          | A (-0.500, 0.500, 0.000) | -0.318 | 3.005 |
|                                          | B (-0.500, 0.000, 0.000) | -0.301 | 2.983 |
|                                          | D (-0.500, 0.000, 0.500) | -0.504 | 3.086 |
|                                          | E (-0.500, 0.500, 0.500) | -0.508 | 3.066 |
|                                          | C (0.000, 0.500, 0.500)  | -0.581 | 3.569 |

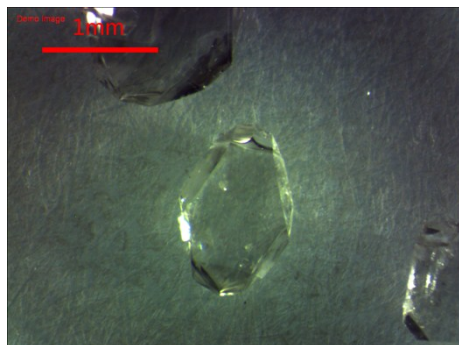

(a)

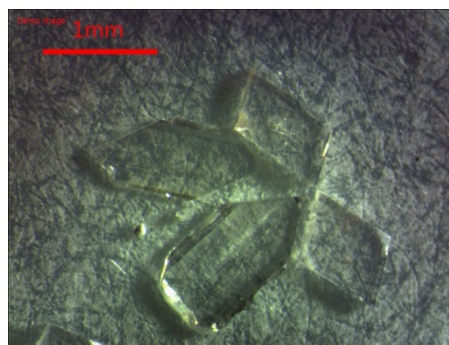

(b)

**Fig. S1** Photos of  $\text{Ca}(\text{IO}_3)_2(\text{HIO}_3)$  (a) and  $\text{Sr}(\text{IO}_3)_2(\text{HIO}_3)$  (b) single crystals by the hydrothermal method.

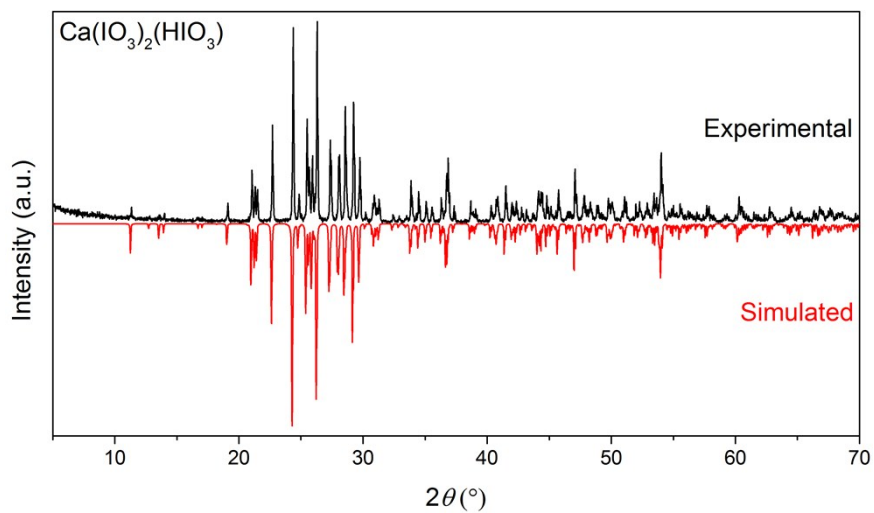

(a)

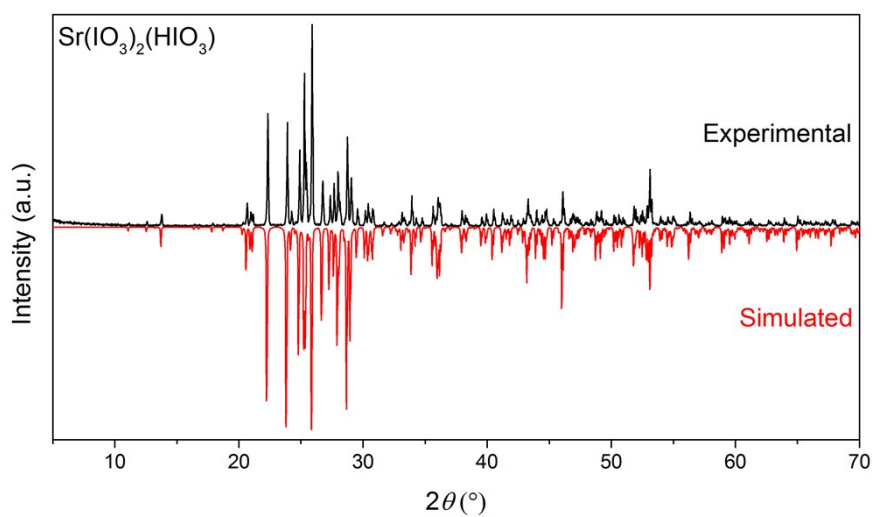

(b)

**Fig. S2** Experimental powder XRD patterns of Ca(IO<sub>3</sub>)<sub>2</sub>(HIO<sub>3</sub>) (a) and Sr(IO<sub>3</sub>)<sub>2</sub>(HIO<sub>3</sub>) (b) and the simulated patterns.

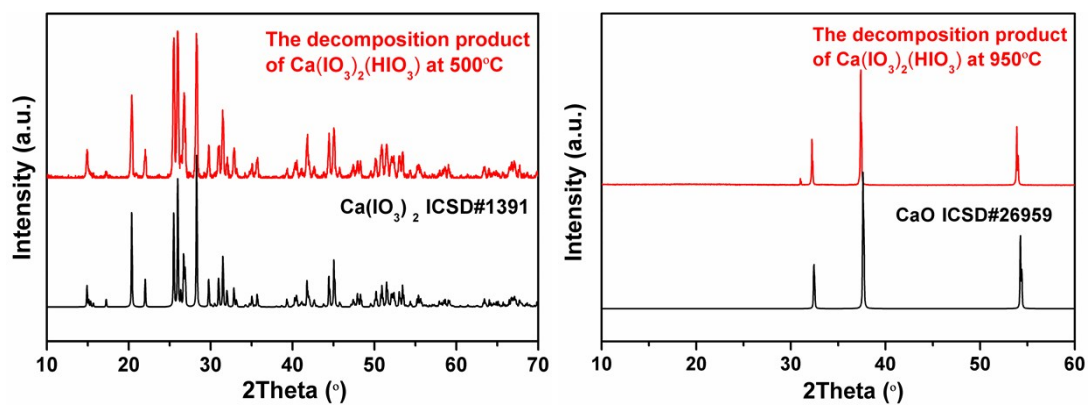

(a)

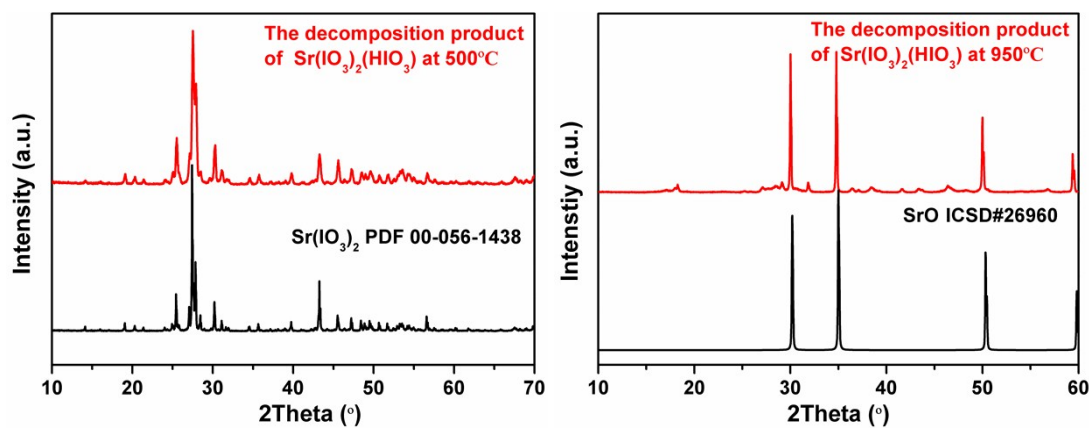

(b)

**Fig. S3** Powder XRD patterns of the decomposition productions at  $500^\circ\text{C}$  and  $950^\circ\text{C}$  for  $\text{Ca}(\text{IO}_3)_2(\text{HIO}_3)$  (a) and  $\text{Sr}(\text{IO}_3)_2(\text{HIO}_3)$  (b).

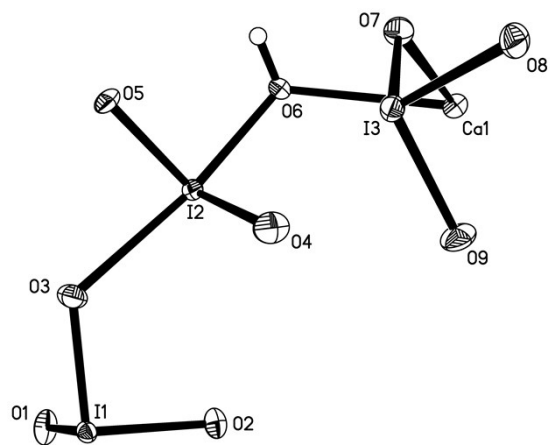

(a)

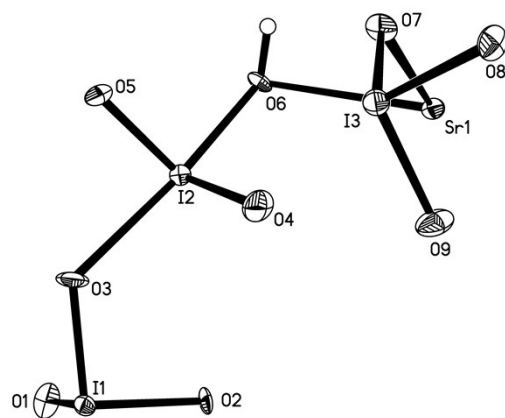

(b)

**Fig. S4** Views of the asymmetric units of  $\text{Ca}(\text{IO}_3)_2(\text{HIO}_3)$  (a) and  $\text{Sr}(\text{IO}_3)_2(\text{HIO}_3)$  (b) with 50% probability displacement.

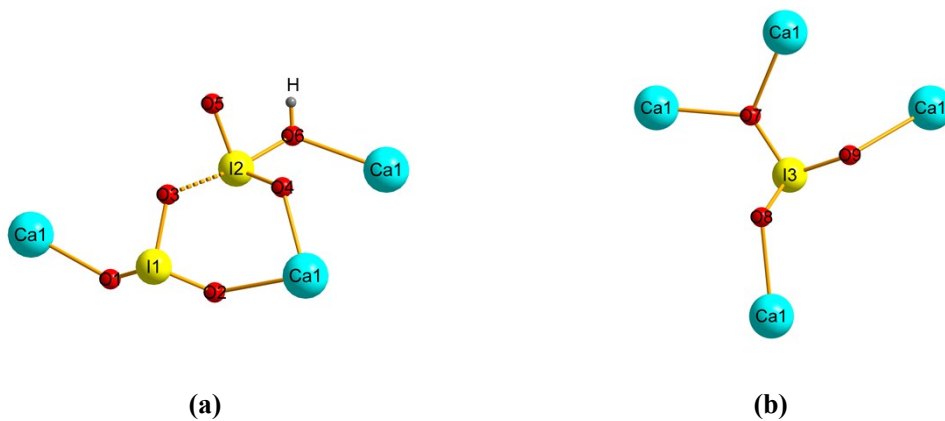

**Fig. S5** Coordination environments of the  $[\text{HIO}_3] \cdot [\text{IO}_3]^-$  complex (a) and  $[\text{I}(3)\text{O}_3]^-$  (b) on  $\text{Ca}^{2+}$  in the structure of  $\text{Ca}(\text{IO}_3)_2(\text{HIO}_3)$ .

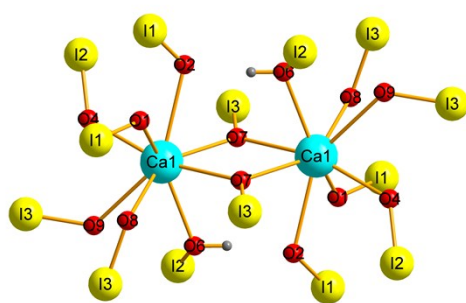

**Fig. S6** Ca<sub>2</sub>O<sub>14</sub> dimer in the structure of Ca(IO<sub>3</sub>)<sub>2</sub>(HIO<sub>3</sub>).
